# Supplementary material
Source: PubMed Central journal article supplement (PMC4890050)
Supplement: icb20161x1.pdf [file icb20161x1.pdf]

# Supplemental Figure 1

(to accompany main Figure 1)

A

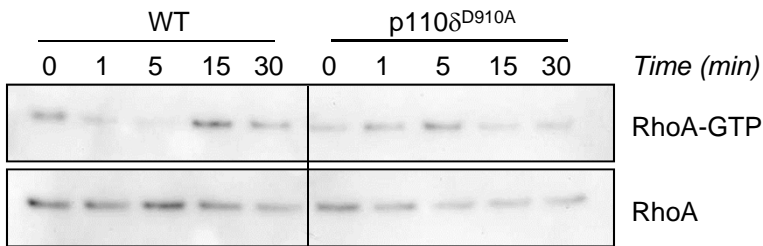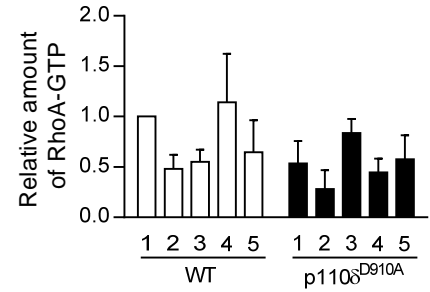

B

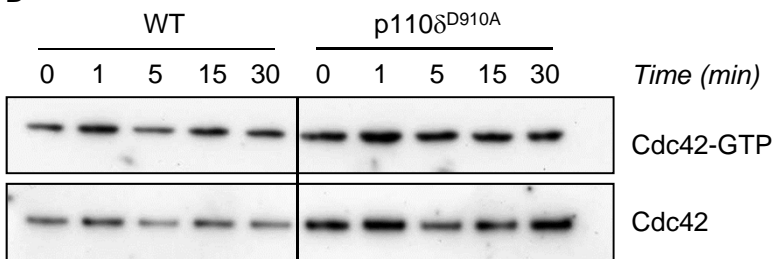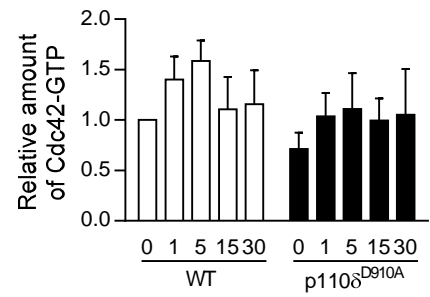

The active form of RhoA (A) or Cdc42 (B) was purified by GST pull-down from WT or p110 $\delta$ <sup>D910A</sup> T cell lysate after stimulation with an anti-CD3 mAb for the indicated times. For quantification, the relative amount of RhoA-GTP or Cdc42-GTP was normalized according to the total amount of the respective total protein. The data are reported as the fold intensity of the normalized GTP-bound small G protein observed at t=0 in the WT condition. Data are representative of three independent experiments.

## Supplemental Figure 2

(to accompany main Figure 3)

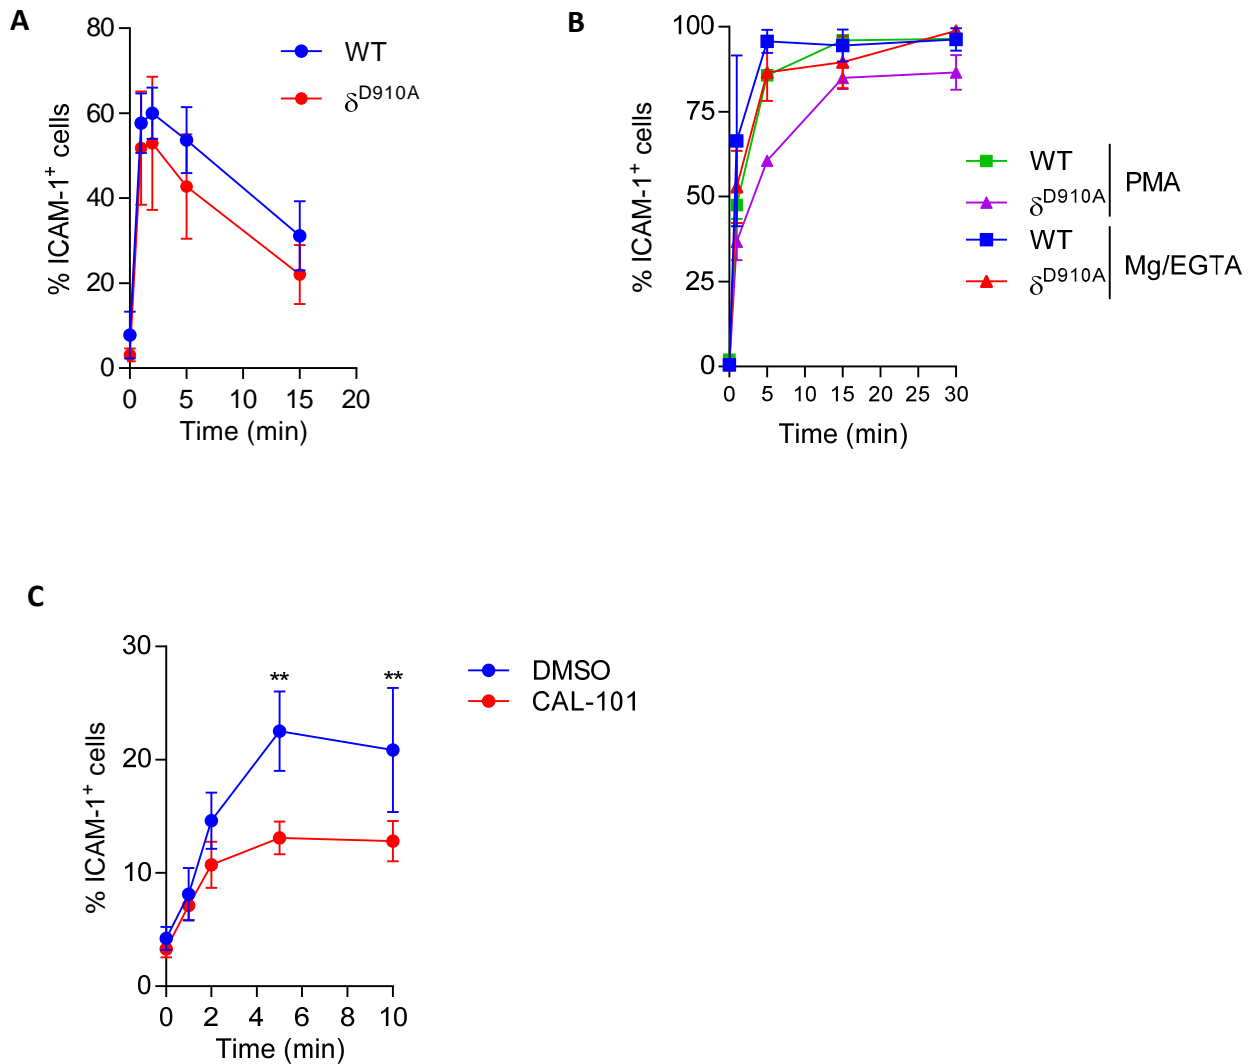

(A-B) CD4<sup>+</sup> T cells were incubated with sc-ICAM-1-APC and stimulated with CCL19 (A), PMA or Mg/EDTA (B). After the indicated times, the reaction was stopped with 4% PFA. Bound scICMA-1-APC was detected by flow cytometry. Data show means of three (A) and two (B) independent experiments. (C) CD4<sup>+</sup> T cells were incubated with DMSO or the p110 $\delta$ -specific inhibitor CAL-101 (200 nM) before being stimulated with anti-CD3 $\epsilon$  in presence of soluble ICAM-1 Fc. After fixation, bound ICAM-1 Fc was detected by staining with anti-human Fc-specific APC-labeled F(ab')<sub>2</sub> fragment. Data show means of three independent experiments.
